# Supplementary material for: Synthetic mycobacterial molecular patterns partially complete Freund’s adjuvant
Source: PubMed Central journal article supplement (PMC7125112; doi:10.1038/s41598-020-62543-5), 2020-04-03

## **Supplemental Information**

### **Title**

Synthetic mycobacterial molecular patterns partially complete Freund's adjuvant

### **Authors/Affiliations**

Jean-Yves Dubé<sup>1,2,3\*</sup>, Fiona McIntosh<sup>2,3</sup>, Juan G. Zarruk<sup>4</sup>, Samuel David<sup>4</sup>, Jérôme Nigou<sup>5</sup>, Marcel A. Behr<sup>1,2,3,6\*</sup>

1, Department of Microbiology and Immunology, McGill University. 2, Infectious diseases and Immunity in Global Health Program, Research Institute of the McGill University Health Centre. 3, McGill International TB Centre. 4, Centre for Research in Neuroscience, Research Institute of the McGill University Health Centre. 5, Institut de Pharmacologie et de Biologie Structurale, Université de Toulouse, CNRS, Université Paul Sabatier, Toulouse, France. 6, Department of Medicine, McGill University Health Centre, Montréal, Canada.

### **Contact Info\***

[jean-yves.dube@mail.mcgill.ca](mailto:jean-yves.dube@mail.mcgill.ca)

[marcel.behr@mcgill.ca](mailto:marcel.behr@mcgill.ca) (Lead Contact)

McGill University Health Centre

1001 boul. Décarie

Glen Site Block E, Office #EM3.3212

Montréal, Québec, Canada

H4A 3J1

### **Supplemental Figure Titles and Legends**

**Figure S1. Flow cytometry gating strategies for lymph node cells.** **A**, gating to quantify cytokine-producing CD4<sup>+</sup>CD8<sup>-</sup> T cells. Shown are representative gating and data from an OVA-stimulated sample (CFA-immunized WT mouse). For comparison, cytokine production for the corresponding unstimulated sample is included. **B**, gating to identify lymph node cell subsets. Shown is gating on a representative sample (CFA-immunized WT mouse). pDCs are B220<sup>+</sup>Ly6C<sup>+</sup>MHC-II<sup>+</sup>CD11b<sup>-</sup>CD11c<sup>+</sup> cells. B cells are B220<sup>+</sup>Ly6C<sup>-</sup>CD11b<sup>-</sup>CD11c<sup>-</sup>CD4<sup>-</sup>CD8a<sup>-</sup> cells. cDCs are B220<sup>-</sup>MHC-II<sup>hi</sup>Ly6C<sup>-</sup>CD11c<sup>+</sup> cells (analyzed subsets are CD11b<sup>+/-</sup>). CD4<sup>+</sup> T cells are B220<sup>-</sup>CD11b<sup>-</sup>CD4<sup>+</sup>CD8a<sup>-</sup> cells. CD8<sup>+</sup> T cells are B220<sup>-</sup>CD11b<sup>-</sup>CD4<sup>-</sup>CD8a<sup>+</sup> cells. Monocytes are B220<sup>-</sup>CD11b<sup>+</sup>Ly6C<sup>+</sup>SSC<sup>lo</sup> cells. PMNs are B220<sup>-</sup>CD11b<sup>+</sup>Ly6C<sup>med</sup>SSC<sup>hi</sup>CD11c<sup>-</sup> cells.

**Figure S2. Addition data on CFA-dependent cell-mediated immune responses as a function of mycobacterial *namH*.** These data are from the same experiments shown in fig. 1C (refer to fig. 1C legend for details). **A-B**, Total numbers (from two lymph nodes) of cytokine-producing CD4+CD8- lymph node cells of mice immunized against OVA with H37Rv, H37Rv  $\Delta namH$ , or IFA alone. Shown are averages  $\pm$  SEM. p-values were calculated with two-tailed student's *t*-tests. \*\* $p < 0.01$ . **C-D**, Contribution of *namH* to the mycobacterial portion of OVA-specific IFN- $\gamma$  elicited by CFA. **C**, result was obtained from %IFN- $\gamma$ + data by subtracting the average IFA background from all CFA data, and plotting the results as % of IFA+H37Rv 'wild-type'. **D**, result was obtained from # IFN- $\gamma$ + data by subtracting the average IFA background from all CFA data, and plotting the results as % of IFA+H37Rv 'wild-type'. Shown are averages  $\pm$  SEM. p-values were calculated with two-tailed student's *t*-tests. \* $p < 0.05$ . **E**, results separated by experimental run for the data presented in fig. 1C and fig. S2A-B. Shown are averages  $\pm$  SEM.

**Figure S3. CFA-dependent IFN- $\gamma$  response by ELISpot as a function of host *Nod2*.** **A-B**, IFN- $\gamma$  ELISpot of inguinal lymph node cells mice immunized against OVA seven days prior, produced in an independent experiment. **A**, number of IFN- $\gamma$  spot-forming cells per one million cells. **B**, total number of IFN- $\gamma$  spot-forming cells per two inguinal lymph nodes. Shown are averages  $\pm$  SEM. p-values were calculated with two-tailed student's *t*-tests. \* $p < 0.05$ . For CFA *Nod2*+/+, CFA *Nod2*-/-, IFA *Nod2*+/+ and IFA *Nod2*-/-, N = 6, 8, 6 and 6 mice, respectively. **C**, flow cytometry of inguinal lymph node cells mice immunized against OVA seven days prior, produced in an independent experiment similar to that in fig. 2A-B. **D**, results separated by experimental run for the data presented in fig. 2C-D and fig. S4C-D. Shown are averages  $\pm$  SEM.

**Figure S4. Additional data on CFA-dependent cell-mediated immune responses as a function of host *Nod2* and *Mincle*.** These data are from the same experiments shown in fig. 2 (refer to fig. 2 legend for details). **A-F**, Total numbers (from two lymph nodes) of cytokine-producing CD4+CD8- lymph node cells of mice immunized against OVA with the indicated adjuvant as a function of: **A-B**, *Nod2*; **C-D**, *Mincle*; **E-F**, *Mincle* and *Nod2* together. Shown are averages  $\pm$  SEM. p-values were calculated with two-tailed student's *t*-tests. \* $p < 0.05$ ; ns, not significant,  $p > 0.05$ .

**Figure S5. Additional data on MHC-II expression and costimulatory molecule upregulation by BMDCs stimulated with GlcC14C18 and MDPs.** **A**, percentage of cells expressing MHC-II at high levels (according to gate in fig. 3B) after 48 hours of stimulation with the indicated MAMPs. **B-E**, median fluorescence intensity of **B**, MHC-II; **C**, CD40; **D**, CD80; **E**, CD86 on CD11b+CD11c+MHC-II<sup>hi</sup> cells after 48 hours of stimulation with the indicated MAMPs (use legend of panel A). Shown are averages  $\pm$  SD of 3 individually stimulated and assayed cultures. **F-I**, histograms of CD11b+CD11c+MHC-II<sup>hi</sup> cells demonstrating expression levels of **F**, MHC-II; **G**, CD40; **H**, CD80; **I**, CD86, for both timepoints (FMOC is not shown for MHC-II because the analysis required MHC-II gating).

**Figure S6. Synthetic adjuvant-dependent IFN- $\gamma$  responses compared to CFA by ELISpot.**

**A-B**, IFN- $\gamma$  ELISpot of inguinal lymph node cells of mice immunized against OVA with the indicated adjuvant seven days prior. **A**, number of IFN- $\gamma$  spot-forming cells per one million cells. **B**, total number of IFN- $\gamma$  spot-forming cells per two inguinal lymph nodes. Data was pooled from two independent experiments. Shown are averages  $\pm$  SEM, where for IFA, IFA + 3  $\mu$ g *N*-glycolyl MDP, IFA + 10  $\mu$ g *N*-glycolyl MDP, IFA + 30  $\mu$ g *N*-glycolyl MDP, IFA + 100  $\mu$ g *N*-glycolyl MDP and CFA, N = 11, 6, 12, 11, 6 and 11 mice, respectively. **C-D**, These data are from the same mice used in fig. 4B (refer to fig. 4B legend for details). **C**, number of IFN- $\gamma$  spot-forming cells per one million cells. **D**, total number of IFN- $\gamma$  spot-forming cells per two inguinal lymph nodes. Shown are averages  $\pm$  SEM. In comparing IFA + 30  $\mu$ g MDP to IFA + MDP + 10 or 30  $\mu$ g GlcC14C18, p-values were calculated using Dunnett's T3 multiple comparisons test. \* $p < 0.05$ ; \*\* $p < 0.01$ ; ns, not significant,  $p > 0.05$ .

**Figure S7. Lymph node cell subset numbers after immunization with synthetic adjuvants.**

These data are from the same mice used in fig. 5 (refer to fig. 5 legend for details of the experiment). **A-F**, From two inguinal lymph nodes at 4 or 7 days post-immunization, shown are total numbers of extracted **A**, B cells; **B**, CD4+ T cells; **C**, CD8+ T cells; **D**, plasmacytoid dendritic cells (pDCs); **E**, monocytes; **F**, polymorphonuclear cells (PMNs). Data are graphed as averages  $\pm$  SEM.

**Figure S8. Additional statistics for RR-EAE.** These data are from the same set shown in fig. 5

(refer to fig. 5 legend for details). **A**, average weight of mice over time  $\pm$  SEM. **B**, maximum EAE score reached on any day by mice, as of day 28. **C**, disease course of mice selected for spinal cord histopathology. **D-G**, Statistics for RR-EAE induced by IFA+TDM+MDP. **D**, average EAE score  $\pm$  SEM over time of mice induced with CFA (N=13) or IFA + 1  $\mu$ g TDM + 30  $\mu$ g *N*-glycolyl MDP (N=13). Mice were euthanized on day 27 post injection. **E**, cumulative EAE score, obtained by adding the EAE score of each mouse over each of the 27 days. Lines represent averages  $\pm$  SEM. **F**, average weight of mice over time  $\pm$  SEM. **G**, maximum EAE score reached on any day by mice, as of day 27.

Supplemental Tables

**Table S1. Flow cytometry antibodies for lymph node cell cytokines**

| Target         | Supplier     | Clone      | Fluorochrome* |
|----------------|--------------|------------|---------------|
| CD3 $\epsilon$ | BD           | 145-2C11   | PE            |
| CD4            | BD           | GK1.5      | BV786         |
| CD8 $\alpha$   | BD           | 53-6.7     | BV711         |
| CD19           | Biolegend    | 6D5        | PE-Dazzle594  |
| B220/CD45R     | BD           | RA3-6B2    | BUV737        |
| IFN- $\gamma$  | Biolegend    | XMG1.2     | APC           |
| IL-2           | BD           | JES6-5H4   | BV605         |
| IL-4           | eBiosciences | BVD6-24G2  | PE-Cy7        |
| IL-17A         | BD           | TC11-18H10 | BUV395        |
| IL-10          | BD           | JES5-16E3  | FITC          |

\*Viability dye: LIVE/DEAD™ Fixable Violet Dead Cell Stain (ThermoFisher Scientific)

**Table S2. Flow cytometry antibodies for lymph node cell DC and subset analysis**

| Target                     | Supplier  | Clone     | Fluorochrome* |
|----------------------------|-----------|-----------|---------------|
| B220/CD45R                 | BD        | RA3-6B2   | BUV737        |
| CD4                        | BD        | GK1.5     | BV786         |
| CD8 $\alpha$               | BD        | 53-6.7    | BV711         |
| CD11b                      | Biolegend | M1/70     | BV605         |
| CD11c                      | BD        | HL3       | FITC          |
| CD40                       | Biolegend | 3/23      | PE-Dazzle594  |
| CD80                       | Biolegend | 16-10A1   | PE            |
| CD86                       | Biolegend | GL1       | PE-Cy7        |
| CD209                      | BD        | 5H10      | BUV395        |
| F4/80                      | Biolegend | BM8       | APC           |
| Ly6C                       | Biolegend | HK1.4     | APC-Cy7       |
| MHC-I (H-2K <sup>b</sup> ) | Biolegend | AF6-88.5  | BV510         |
| MHC-II (I-A <sup>b</sup> ) | Biolegend | AF6-120.1 | PerCP-Cy5.5   |

\*Viability dye: LIVE/DEAD™ Fixable Violet Dead Cell Stain (ThermoFisher Scientific)

**Table S3. Flow cytometry antibodies for BMDCs**

| Target                     | Supplier  | Clone     | Fluorochrome* |
|----------------------------|-----------|-----------|---------------|
| CD11b                      | Biolegend | M1/70     | PerCP-Cy5.5   |
| CD11c                      | BD        | HL3       | FITC          |
| CD40                       | Biolegend | 3/23      | PE-Dazzle594  |
| CD80                       | Biolegend | 16-10A1   | PE            |
| CD86                       | Biolegend | GL1       | PE-Cy7        |
| MHC-II (I-A <sup>b</sup> ) | Biolegend | AF6-120.1 | APC           |

\*Viability dye: LIVE/DEAD™ Fixable Violet Dead Cell Stain (ThermoFisher Scientific)

# FIG. S1

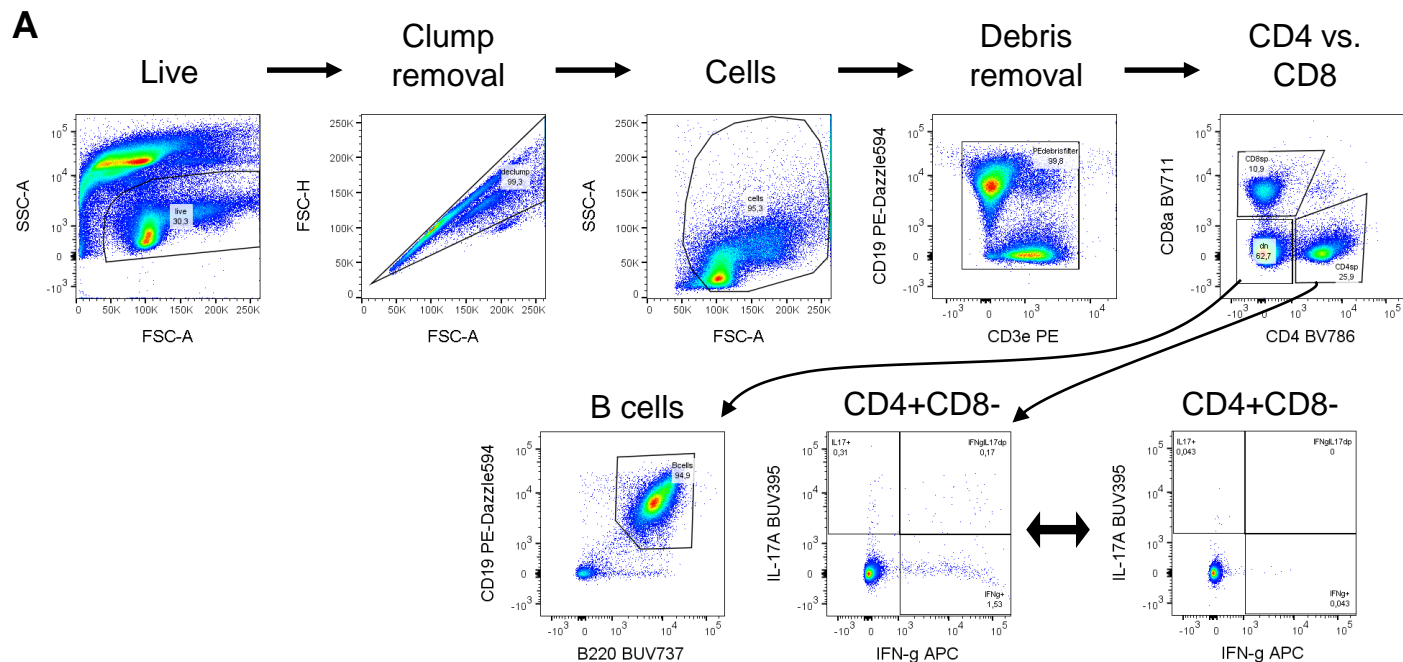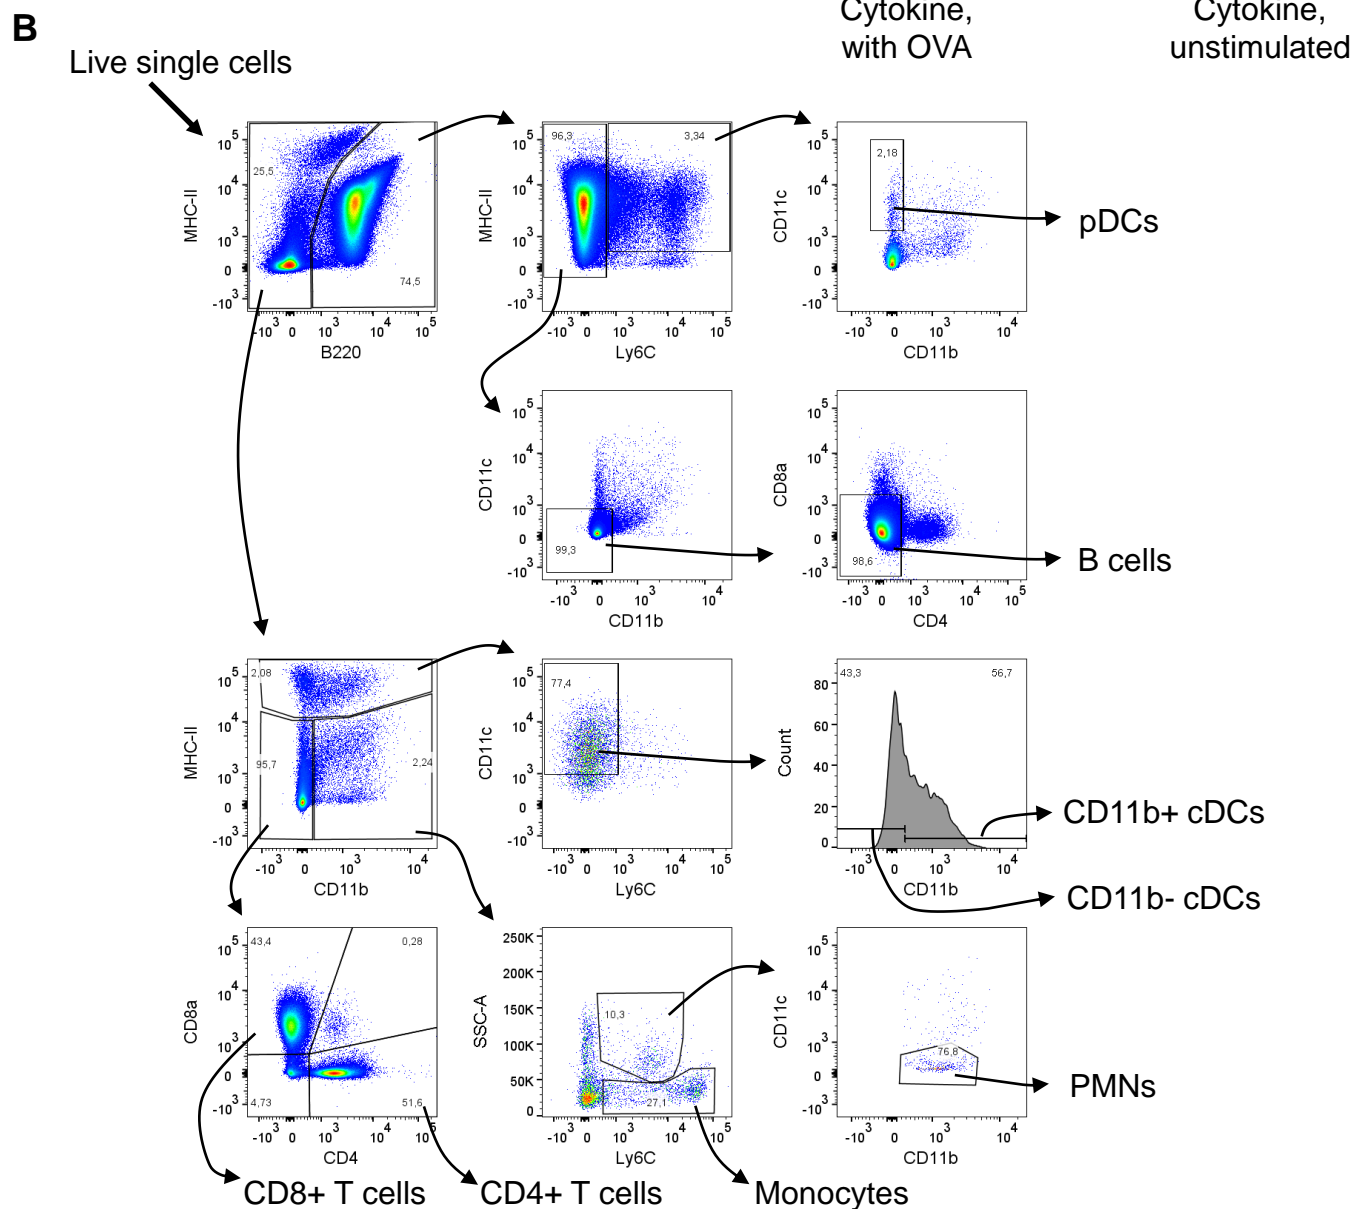

# FIG. S2

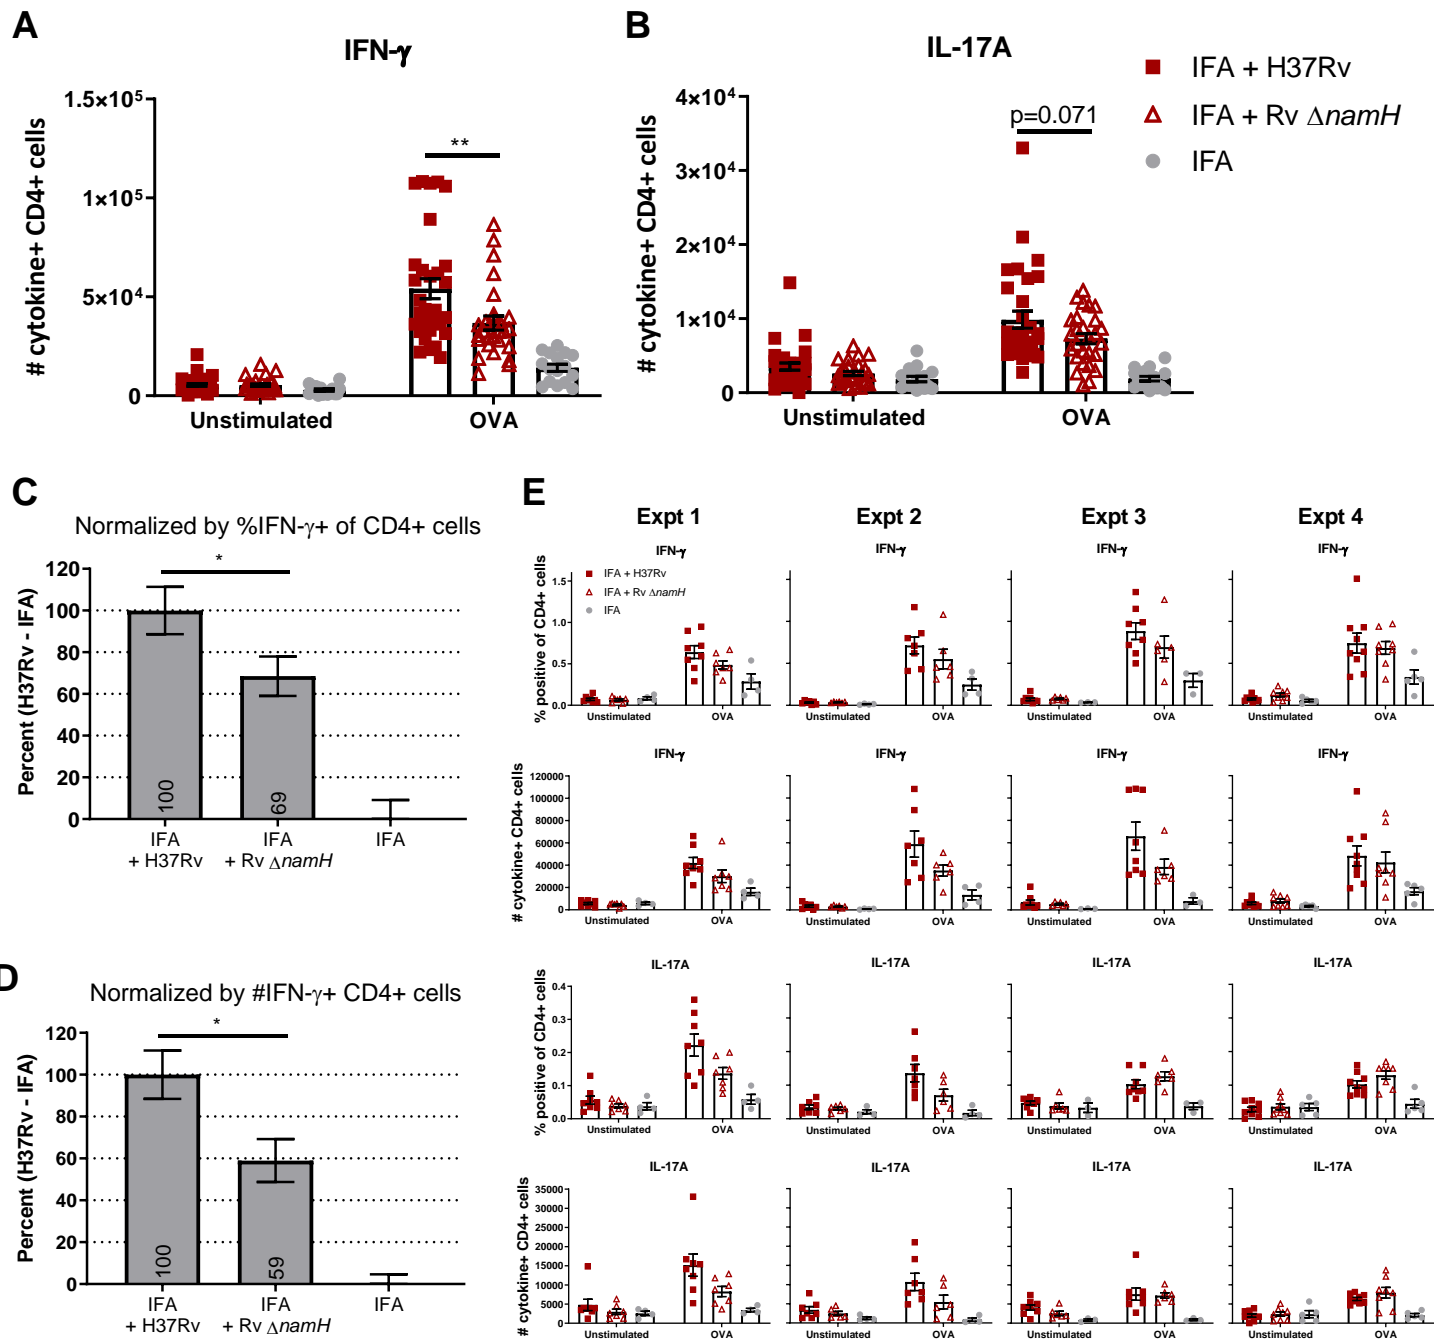

# FIG. S3

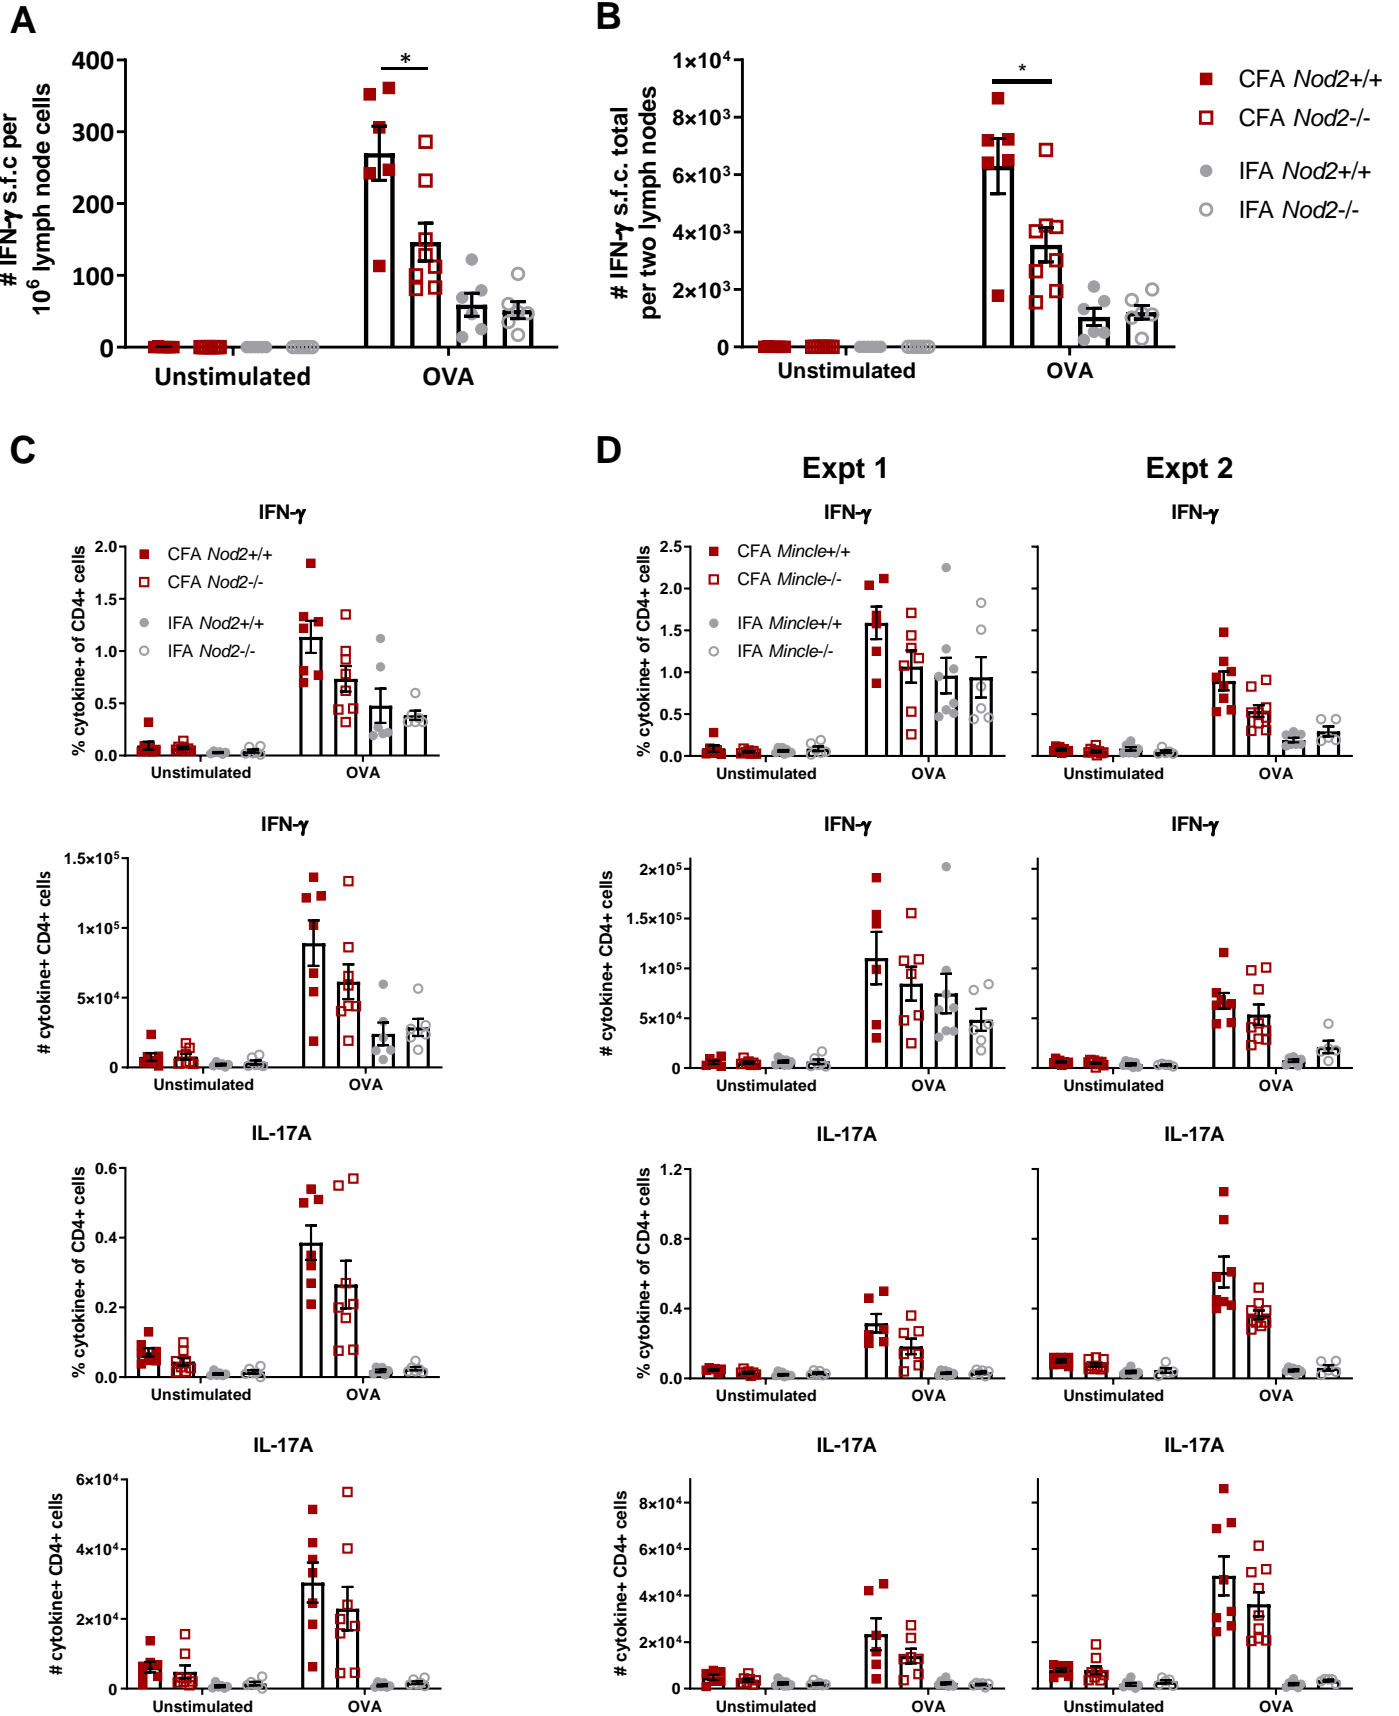

# FIG. S4

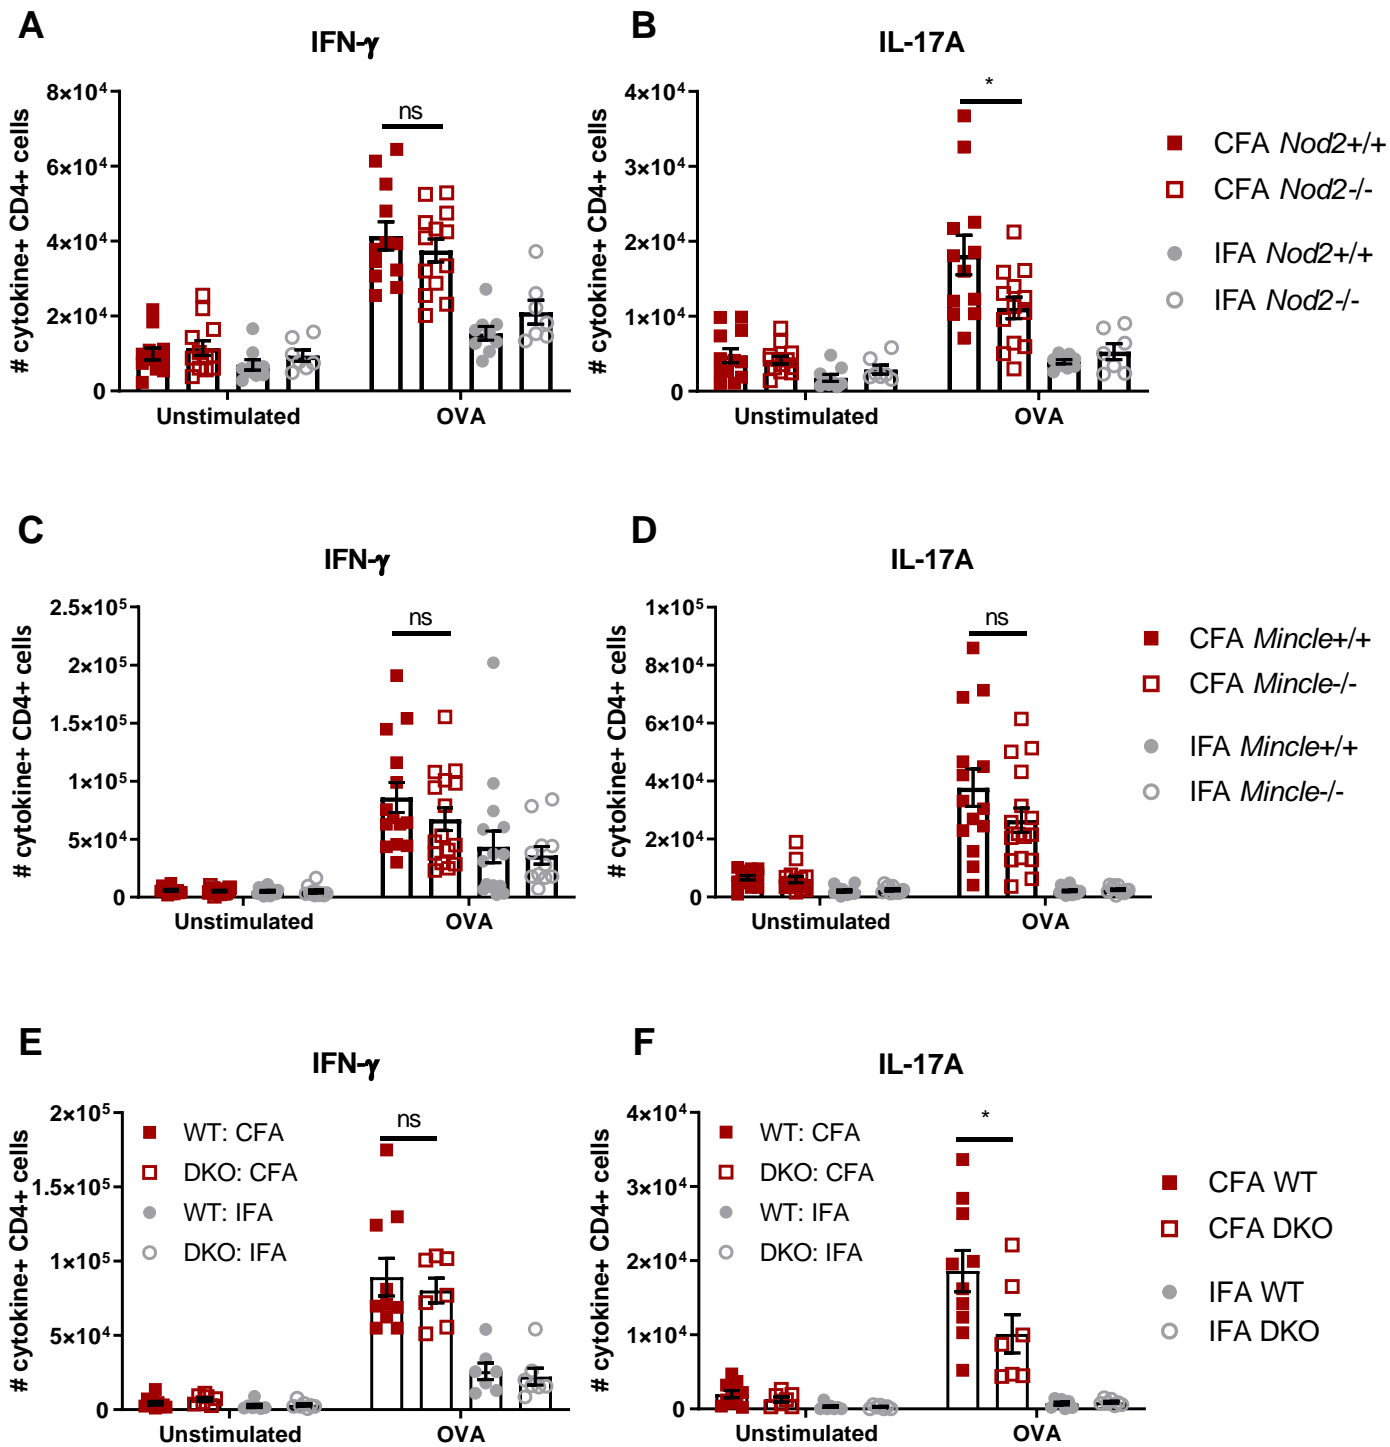



# FIG. S5

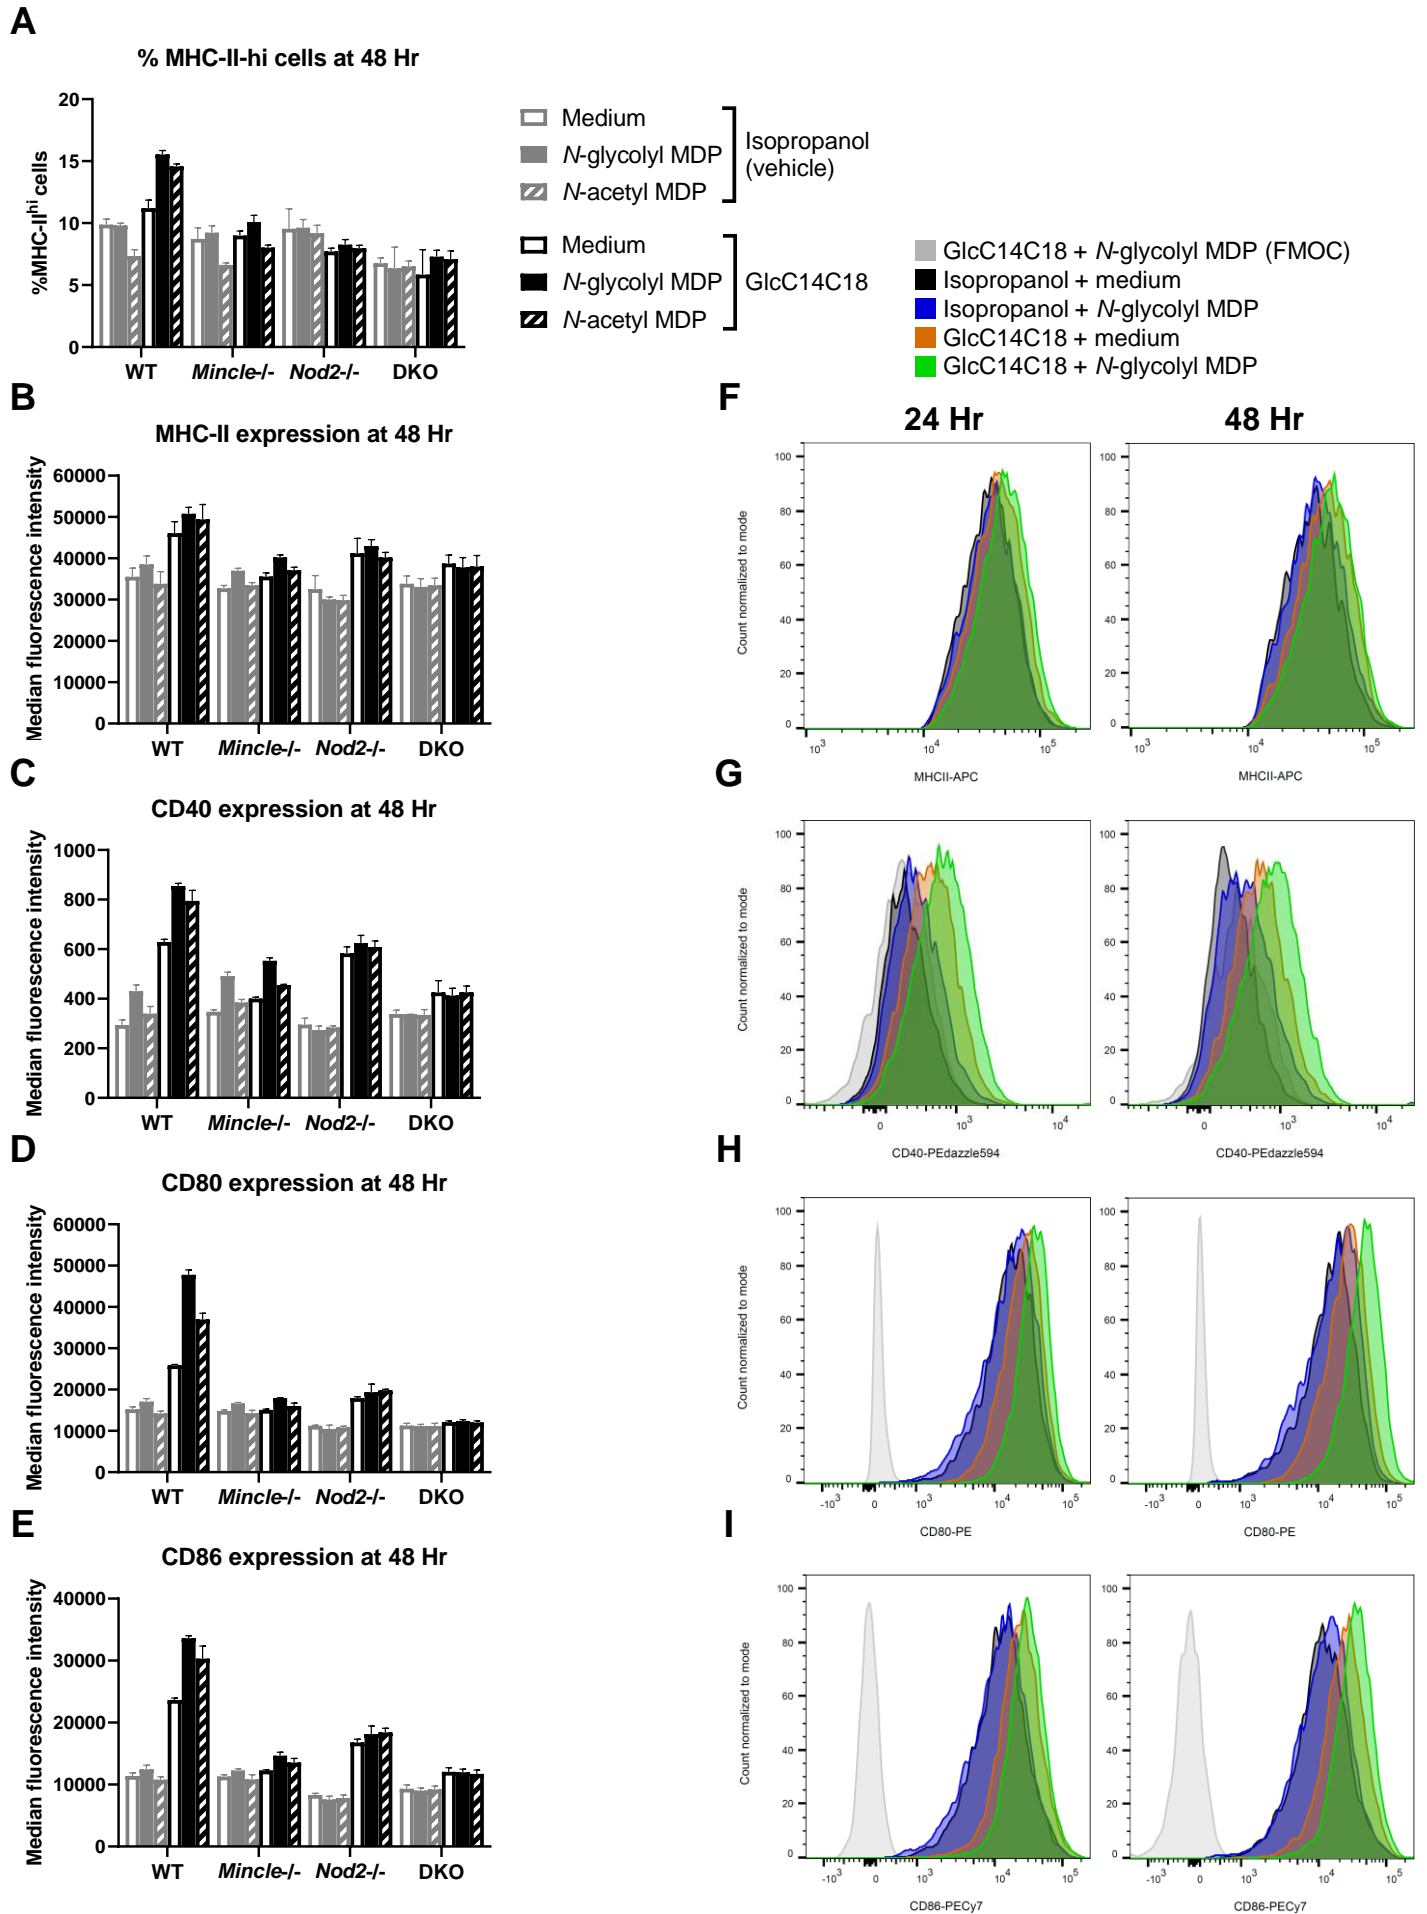

# FIG. S6

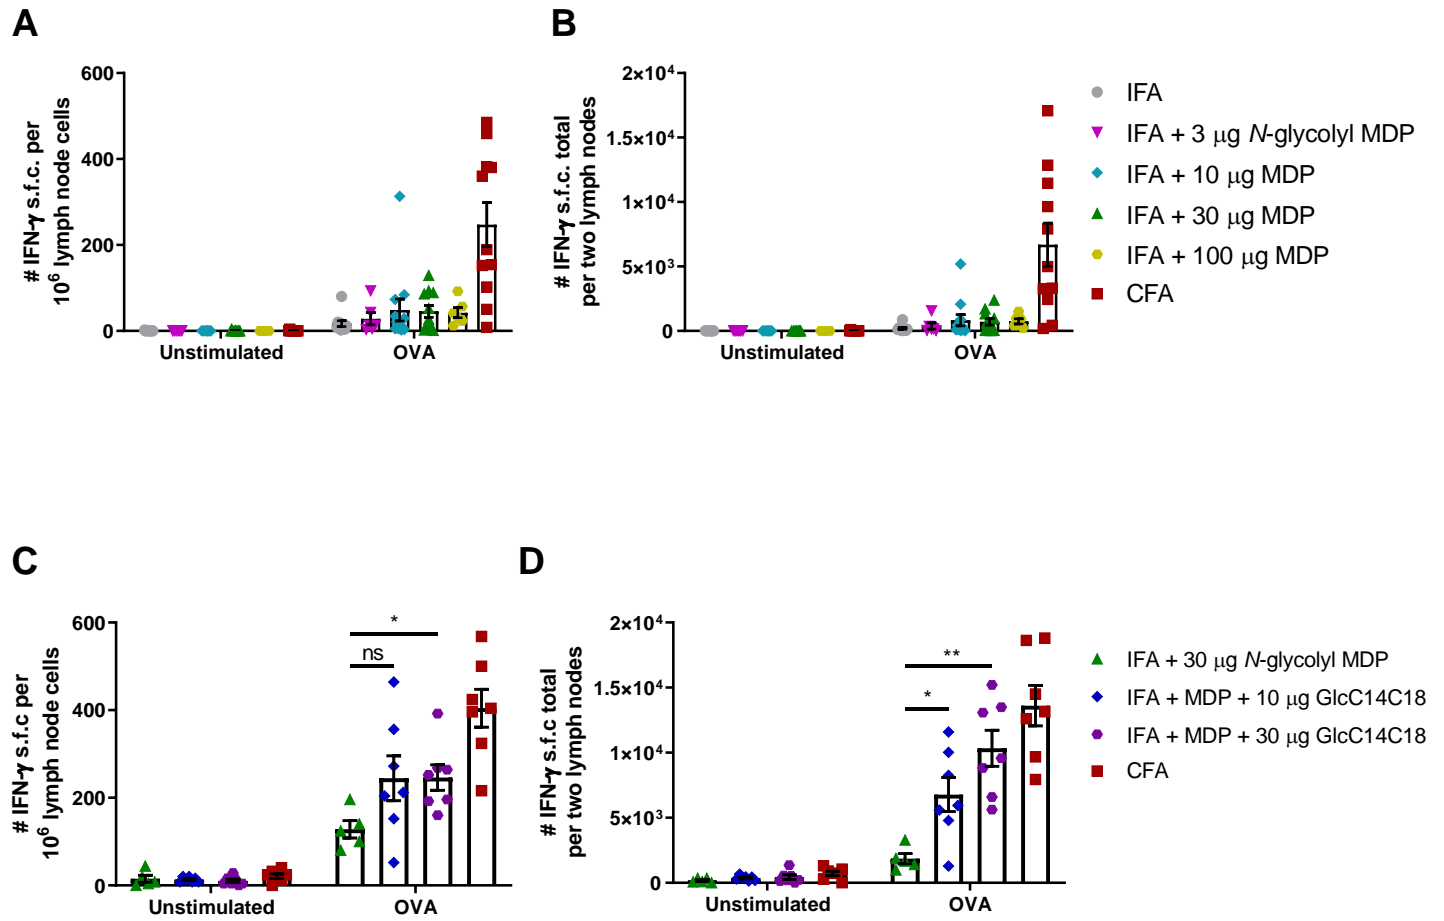

# FIG. S7

- IFA
- ▲ IFA + 30  $\mu\text{g}$  *N*-glycolyl MDP
- ▼ IFA + 10  $\mu\text{g}$  GlcC14C18
- ◆ IFA + GlcC14C18 + *N*-glycolyl MDP
- CFA

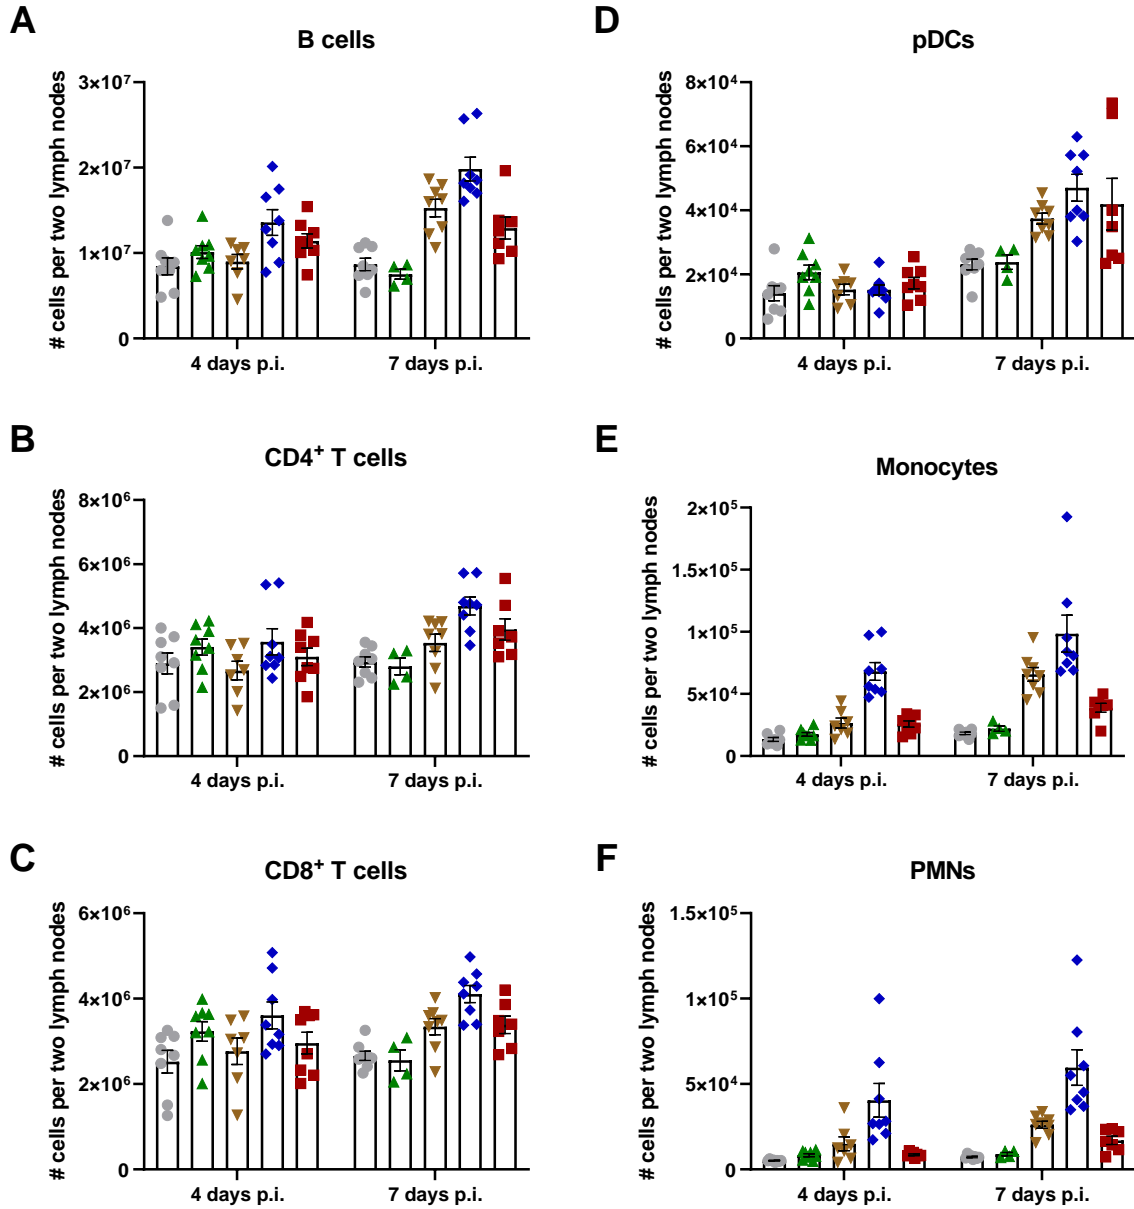

# FIG. S8

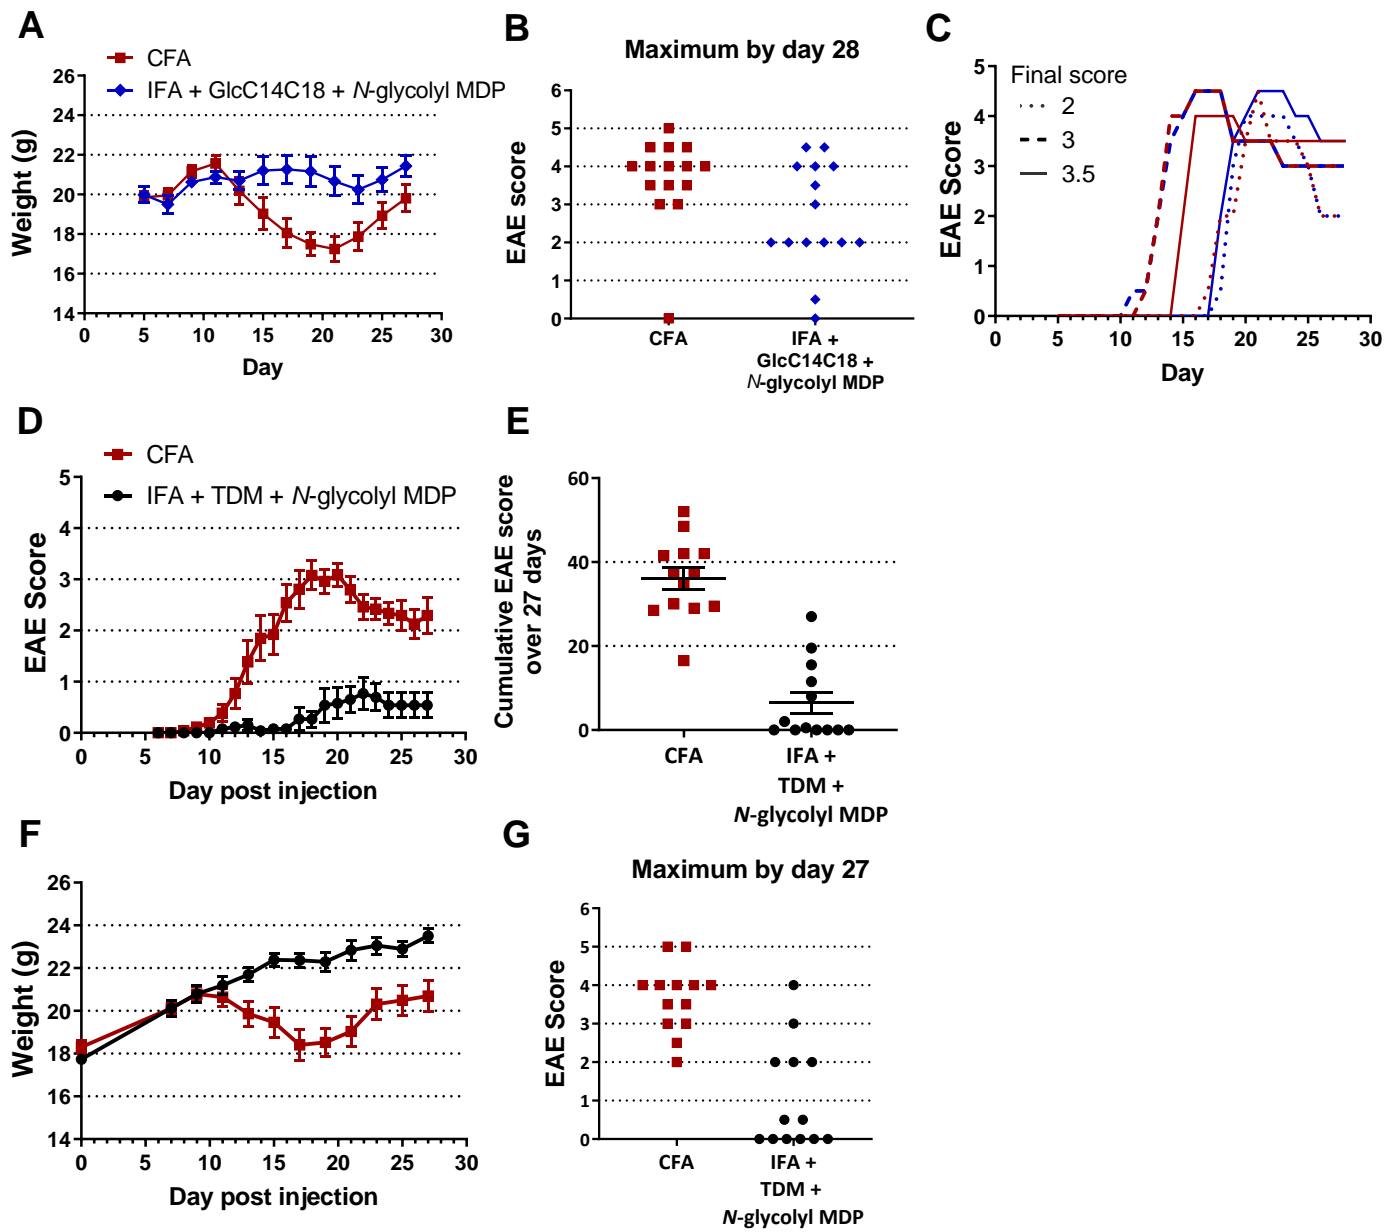

Supplement: 41598_2020_62543_MOESM1_ESM.pdf [file 41598_2020_62543_MOESM1_ESM.pdf]
